# Supplementary material for: Impact of Service Quality of Low-Cost Carriers on Airline Image and Consumers’ Satisfaction and Loyalty during the COVID-19 Outbreak
Source: MDPI journal article supplement (doi:10.3390/ijerph19010083), 2021-12-22
Supplement: s1 [file s1]

**Table S1.** Group-based differences of different constructs based on the Demographic and travel-related characteristics.

| Parameter                         | Category                  | Service Quality  | Reliability      | Assurance        | Empathy          | Tangible         | Responsiveness   | Satisfaction     | Image            | Loyalty          |
|-----------------------------------|---------------------------|------------------|------------------|------------------|------------------|------------------|------------------|------------------|------------------|------------------|
| Gender                            | Male                      | 3.67 (3.07-4.20) | 3.83 (3.17-4.17) | 3.33 (2.67-4.00) | 4.00 (3.00-4.00) | 4.00 (3.00-4.50) | 3.50 (2.50-4.50) | 3.50 (3.00-4.50) | 4.00 (3.00-4.33) | 3.50 (3.00-4.50) |
|                                   | Female                    | 3.67 (2.47-4.25) | 3.67 (2.17-4.33) | 3.33 (2.33-4.00) | 3.75 (2.50-4.50) | 3.75 (2.50-4.50) | 4.00 (2.50-4.50) | 3.50 (2.50-4.50) | 3.67 (2.67-4.67) | 3.00 (2.00-4.00) |
|                                   | <b>p*</b>                 | <b>0.492</b>     | <b>0.246</b>     | <b>0.365</b>     | <b>0.792</b>     | <b>0.422</b>     | <b>0.441</b>     | <b>0.583</b>     | <b>0.424</b>     | <b>0.012</b>     |
| Age                               | Under 18                  | 4.00 (2.63-4.50) | 3.83 (2.58-4.33) | 4.00 (2.83-5.00) | 4.00 (2.50-4.75) | 3.50 (2.50-4.75) | 3.50 (2.75-5.00) | 3.00 (2.50-4.25) | 4.00 (2.33-4.50) | 2.00 (1.00-4.00) |
|                                   | 18-24                     | 3.53 (2.33-4.27) | 3.50 (2.00-4.46) | 3.00 (2.33-4.00) | 3.50 (2.50-4.50) | 4.00 (2.00-4.50) | 4.00 (2.00-4.50) | 3.50 (2.50-4.50) | 3.67 (2.67-4.67) | 3.25 (2.00-4.50) |
|                                   | 25-34                     | 3.80 (3.40-4.20) | 4.00 (3.50-4.29) | 3.67 (2.75-4.00) | 4.00 (3.00-4.50) | 4.00 (3.00-4.50) | 3.75 (3.00-4.50) | 4.00 (3.50-4.00) | 3.83 (3.00-4.67) | 3.50 (3.00-4.38) |
|                                   | 35-44                     | 3.60 (3.07-4.13) | 3.83 (3.33-4.17) | 3.33 (2.67-4.00) | 4.00 (3.00-4.50) | 3.50 (3.00-4.50) | 3.50 (3.00-4.50) | 3.50 (3.00-4.00) | 3.67 (3.00-4.00) | 3.50 (3.00-4.00) |
|                                   | > 45                      | 3.67 (2.80-4.20) | 3.83 (2.67-4.17) | 3.33 (2.67-4.00) | 4.00 (3.00-4.00) | 3.50 (3.00-4.50) | 4.00 (1.50-4.50) | 3.50 (2.50-4.50) | 3.67 (3.00-4.67) | 3.50 (2.50-4.00) |
|                                   | <b>p¥</b>                 | <b>0.636</b>     | <b>0.413</b>     | <b>0.431</b>     | <b>0.655</b>     | <b>0.963</b>     | <b>0.97</b>      | <b>0.196</b>     | <b>0.69</b>      | <b>0.231</b>     |
| Number of previous trips via LCCs | Just once                 | 3.80 (3.20-4.20) | 3.83 (3.00-4.33) | 3.33 (2.67-4.00) | 4.00 (3.00-4.50) | 3.50 (3.00-4.50) | 4.00 (3.00-4.50) | 3.50 (2.50-4.00) | 3.67 (3.00-4.67) | 3.50 (2.50-4.50) |
|                                   | 2 times                   | 3.63 (2.53-4.33) | 3.67 (2.33-4.33) | 3.33 (2.33-4.33) | 3.50 (2.63-5.00) | 4.00 (2.50-4.50) | 3.75 (2.00-5.00) | 3.50 (2.50-4.50) | 3.67 (2.67-4.33) | 3.50 (2.50-4.38) |
|                                   | 3 or more                 | 3.27 (2.33-4.18) | 3.50 (2.00-4.33) | 3.00 (2.33-4.00) | 3.50 (2.50-4.38) | 3.50 (2.00-4.50) | 3.50 (2.00-4.50) | 3.50 (2.63-4.50) | 3.67 (2.33-4.33) | 3.00 (2.00-4.00) |
|                                   | <b>p¥</b>                 | <b>0.073</b>     | <b>0.068</b>     | <b>0.060</b>     | <b>0.104</b>     | <b>0.739</b>     | <b>0.098</b>     | <b>0.954</b>     | <b>0.351</b>     | <b>0.080</b>     |
| Purpose of the most recent trip   | Business                  | 3.60 (2.67-4.20) | 3.83 (2.50-4.33) | 3.00 (2.33-4.00) | 3.50 (2.50-4.50) | 3.50 (2.50-4.50) | 3.50 (2.00-4.50) | 3.50 (3.00-4.50) | 3.67 (2.33-4.33) | 3.50 (2.00-4.00) |
|                                   | Leisure                   | 3.73 (2.53-4.27) | 3.83 (2.17-4.33) | 3.67 (2.67-4.33) | 4.00 (2.50-4.50) | 4.00 (2.50-4.50) | 4.00 (3.00-5.00) | 3.50 (2.50-4.50) | 4.00 (3.00-4.67) | 3.50 (2.50-4.50) |
|                                   | Both Business and Leisure | 3.40 (3.40-3.40) | 3.17 (3.17-3.17) | 3.33 (3.33-3.33) | 3.00 (3.00-3.00) | 4.50 (4.50-4.50) | 3.50 (3.50-3.50) | 2.00 (2.00-2.00) | 4.67 (4.67-4.67) | 4.50 (4.50-4.50) |
|                                   | Education                 | 2.83 (2.53-4.33) | 2.75 (1.88-4.46) | 3.17 (3.00-4.00) | 3.50 (2.63-4.38) | 3.00 (2.00-4.00) | 2.75 (2.00-4.88) | 3.25 (2.00-4.00) | 3.33 (2.50-4.58) | 3.25 (2.50-4.38) |
|                                   | Hajj/Umrah                | 3.73 (3.07-4.02) | 3.67 (3.29-4.00) | 3.33 (2.33-4.00) | 4.00 (3.50-4.50) | 3.75 (3.00-4.50) | 3.50 (2.50-4.50) | 3.50 (2.50-4.00) | 3.67 (2.67-4.33) | 3.50 (2.50-4.50) |
|                                   | <b>p¥</b>                 | <b>0.862</b>     | <b>0.868</b>     | <b>0.619</b>     | <b>0.483</b>     | <b>0.513</b>     | <b>0.465</b>     | <b>0.323</b>     | <b>0.450</b>     | <b>0.593</b>     |

\* results were based on a Mann-Whitney U test; ¥ results were based on a Kruskal Wallis Test.
